**Pre-COVID-19 pandemic health-related behaviours in children (2018-2020) and association with being tested for SARS-CoV-2 and testing positive for SARS-CoV-2 (2020-2021): a retrospective cohort study using survey data linked with routine health data in Wales, UK**

Emily Marchant<sup>1,2\*</sup>, Emily Lowthian<sup>1,3</sup>, Tom Crick<sup>3</sup>, Lucy Griffiths<sup>1</sup>, Richard Fry<sup>1,2</sup>, Kevin Dadaczynski<sup>4,5</sup>, Orkan Okan<sup>6</sup>, Michaela James<sup>1,2</sup>, Laura Cowley<sup>2,7</sup>, Fatemeh Torabi<sup>1</sup>, Jonathan Kennedy<sup>1,2</sup>, Ashley Akbari<sup>1</sup>, Ronan Lyons<sup>1</sup>, Sinead Brophy<sup>1,2</sup>

<sup>1</sup> Population Data Science, Medical School, Swansea University, Swansea, SA2 8PP, United Kingdom

<sup>2</sup> National Centre for Population Health and Wellbeing Research, Swansea University, Swansea, SA2 8PP, United Kingdom

<sup>3</sup> Department of Education & Childhood Studies, Swansea University, Swansea, SA2 8PP, United Kingdom

<sup>4</sup> Department of Nursing and Health Science, Fulda University of Applied Sciences, Fulda, 36037, Germany

<sup>5</sup> Center for Applied Health Science, Leuphana University Lüneburg, Lüneburg, 21335, Germany

<sup>6</sup> Health Literacy, Department of Sport and Health Sciences, Technical University Munich, Uptown München-Campus D, 4. OG, Office L412, Georg-Brauchle-Ring 60/62, 80992 München, Germany

<sup>7</sup> Research and Evaluation Division, Public Health Knowledge and Research Directorate, Public Health Wales, 2 Capital Quarter, Cardiff, CF10 4BZ, United Kingdom

\* Corresponding author: Emily Marchant <sup>1,2</sup>, email: [E.K.Marchant@swansea.ac.uk](mailto:E.K.Marchant@swansea.ac.uk)

**NOTE: This preprint reports new research that has not been certified by peer review and should not be used to guide clinical practice.**

# ABSTRACT

## Objectives

Examine if pre-COVID-19 pandemic (prior March 2020) health-related behaviours during primary school are associated with i) being tested for SARS-CoV-2 and ii) testing positive between 1 March 2020 to 31 August 2021.

## Design

Retrospective cohort study using an online cohort survey (January 2018 to February 2020) linked to routine PCR SARS-CoV-2 test results.

## Setting

Children attending primary schools in Wales (2018-2020), UK who were part of the HAPPEN school network.

## Participants

Complete linked records of eligible participants were obtained for n=7,062 individuals. 39.1% (n=2,764) were tested (age 10.6±0.9, 48.9% girls) and 8.1% (n=569) tested positive for SARS-CoV-2 (age 10.6±1.0, 54.5% girls).

## Main outcome measures

Logistic regression of health-related behaviours and demographics were used to determine Odds Ratios (OR) of factors associated with i) being tested for SARS-CoV-2 and ii) testing positive for SARS-CoV-2.

## Results

Consuming sugary snacks (1-2 days/week OR=1.24, 95% CI 1.04 – 1.49; 5-6 days/week 1.31, 1.07 – 1.61; reference 0 days) can swim 25m (1.21, 1.06 – 1.39) and age (1.25, 1.16 – 1.35)

were associated with an increased likelihood of being tested for SARS-CoV-2. Eating breakfast (1.52, 1.01 – 2.27), weekly physical activity  $\geq 60$  mins (1-2 days 1.69, 1.04 – 2.74; 3-4 days 1.76, 1.10 – 2.82, reference 0 days), out of school club participation (1.06, 1.02 – 1.10), can ride a bike (1.39, 1.00 – 1.93), age (1.16, 1.05 – 1.28) and girls (1.21, 1.00 – 1.46) were associated with an increased likelihood of testing positive for SARS-CoV-2. Living in least deprived quintiles 4 (0.64, 0.46 – 0.90) and 5 (0.64, 0.46 – 0.89) compared to the most deprived quintile was associated with a decreased likelihood.

## Conclusions

Associations may be related to parental health literacy and monitoring behaviours. Physically active behaviours may include co-participation with others, and exposure to SARS-CoV-2. A risk versus benefit approach must be considered given the importance of health-related behaviours for development.

## STRENGTHS AND LIMITATIONS

- Investigation of the association of pre-pandemic child health-related behaviour measures with subsequent SARS-CoV-2 testing and infection.
- Reporting of multiple child health behaviours linked at an individual-level to routine records of SARS-CoV-2 testing data through the SAIL Databank.
- Child-reported health behaviours were measured before the COVID-19 pandemic (1 January 2018 to 28 February 2020) which may not reflect behaviours during COVID-19.

- Health behaviours captured through the national-scale HAPPEN survey represent children attending schools that engaged with the HAPPEN Wales primary school network and may not be representative of the whole population of Wales.
- The period of study for PCR-testing for and testing positive for SARS-CoV-2 includes a time frame with varying prevalence rates, approaches to testing children (targeted and mass testing) and restrictions which were not measured in this study.

## BACKGROUND

The coronavirus disease 2019 (COVID-19) pandemic caused by severe acute respiratory syndrome coronavirus 2 (SARS-CoV-2) has resulted in widespread disruption to the lives of children across the world, and has contributed to widened inequalities in children's health, wellbeing and education[1,2]. Childhood is a critical developmental period during which health behaviours are established which transcend into adolescence and adulthood[3]. The Organisation for Economic Co-operation and Development (OECD) recognised current trends in children's health, highlighting typical health behaviours of school-aged children that warrant further research in order to better design policies that improve children's health outcomes[4,5]. These include nutrition-related behaviours such as fruit and vegetable intake, consumption of sugary foods and breakfast consumption, physical activity and sedentary behaviours and sleep. The establishment of these health behaviours during childhood are highly influenced by parental mechanisms and monitoring behaviours, particularly in children aged under 12 [6–8].

Whilst evidence has demonstrated the negative impact of the COVID-19 pandemic on children's health-related behaviours including reduced physical activity, increased sedentary behaviour and poorer nutrition[1,9], it is unclear if this association is bidirectional. That is, whether these health behaviours are associated with risk of SARS-CoV-2 infection. Within the adult population, emerging evidence suggests a plausible relationship between pre-pandemic health risk behaviours such as physical inactivity and poor nutrition with SARS-CoV-2 infection and severity of disease[10–13], and increased risk of other infectious diseases[14]. This is attributed to the important role health behaviours play in shaping cardiometabolic health and immune system function. Indeed, research shows links to the early years including critical

early developmental stages with subsequent risk of developing chronic inflammation, which is associated with non-communicable disease risk and mortality during adulthood [15]. Health behaviours such as adequate nutrient intake[16] and physical activity[17] are required for the regulation and function of the immune system.

As a result, academics have advocated for consideration to be placed on the role of these health behaviours in future endemic/pandemic scenarios[17]. However, research to date has concentrated on adults, explored single health behaviours or examined those with severe COVID-19 infection and hospitalisation[18,19]. The focus of research within the childhood population has principally been placed on clinical outcomes as opposed to lifestyle outcomes, including identifying the clinical characteristics of severe infection, the presence of comorbidities, common symptoms such as cough and clinical biomarkers[20,21]. Whilst serious COVID-19 illness in children is relatively rare, mild or asymptomatic infection is common[22]. Positive SARS-CoV-2 tests require periods of self-isolation, impacting children's physical health and wellbeing, limiting opportunities for children to engage in health-promoting behaviours essential for optimal development such as regular physical activity[9,23]. Therefore, research examining the role of these health behaviours in a childhood population within the context of the COVID-19 pandemic is warranted.

Identifying the pre-pandemic health-related behavioural characteristics of children requiring a SARS-CoV-2 test or testing positive for SARS-CoV-2 infection and hypothesising potential mechanisms through which these may operate, including exposures, socio-demographic and parental influences could yield insight to inform the current COVID-19 pandemic and future pandemic/endemic scenarios. This can also allow targeted intervention to minimise transmission risk that complements national public health measures and

guidelines, and importantly, mitigates the disruption to children's lives and prevent further exacerbation of pre-existing inequalities, safeguarding their health, wellbeing and education.

In Wales, one of the four nations of the UK, approaches to performing Polymerase Chain Reaction (PCR) tests on children during the period of study included the presence of COVID-19 symptoms, if identified as a close contact to a positive case (e.g. household contacts), or as a follow-up PCR test as encouraged in guidance at the time following a positive Lateral Flow Test (LFT) (e.g. showing symptoms or a close contact and having a positive LFT performed in the home)[24]. Uptake of testing within the childhood population requires parental monitoring behaviours, for example, providing transport to testing facilities and parental health literacy through identification of symptoms.

This study investigates the association of pre-pandemic (prior to 1 March 2020) health-related behaviours self-reported by children aged 8-11 years during primary school before the COVID-19 pandemic between 1 January 2018 and 28 February 2020, with two outcomes; the odds of ever having a SARS-CoV-2 PCR test and the odds of testing positive for SARS-CoV-2 during the period of study. We aim to examine whether these self-reported markers of health-related behaviours reported pre-pandemic are associated with the likelihood of; i) ever being tested for SARS-CoV-2 and ii) ever testing positive for SARS-CoV-2 between 1 March 2020 and 31 August 2021.

## METHODS

### Study design

This retrospective cohort study was conducted through the HAPPEN primary school network (*Health and Attainment of Pupils in a Primary Education Network*)[25]. HAPPEN was

established in Wales, UK in 2014, following research with headteachers who advocated for increased collaboration to prioritise pupils' health and wellbeing[26,27]. The network brings together primary schools with research and runs up to the current date. School participation in HAPPEN is voluntary and is either once, annually or bi-annually (e.g. to evaluate school-based interventions). Through HAPPEN, children aged 8-11 (years 4 to 6) complete the HAPPEN survey, an online cohort survey that captures a range of validated self-reported health behaviours including physical activity, nutrition and sleep[28]. Retrospective health-related behaviour data were obtained from responses from the HAPPEN survey completed pre-pandemic between 1 January 2018 and 28 February 2020.

These retrospective survey responses were linked with PCR SARS-CoV-2 test results obtained from the Pathology COVID-19 Daily (PATD) routine dataset between 1 March 2020 and 31 August 2021. The PATD dataset contains pillar 1 (swab testing in Public Health England (PHE) labs, NHS Wales labs and NHS hospitals for those with a clinical need, and health and care workers) and pillar 2 (swab testing for the wider population, as set out in government guidance) individual results from PCR tests (negative (suspected), positive (confirmed) for SARS-CoV-2[29]. The period of interest (1 March 2020 to 31 August 2021) includes a time frame of varying approaches to testing children, documented in timeline format in online supplemental appendix 1[29]. This includes targeted (i.e. symptomatic and suspected positive case, identified as a close contact of a positive case) and mass testing (i.e. between February 2021 and April 2021 the use of LFTs in the school setting for pupils aged 11 and above (secondary school age) to identify asymptomatic positive cases, with guidance for positive LFTs encouraging follow up PCR tests).

Linkage was performed using the SAIL (*Secure Anonymised Information Linkage*) Databank[30–32]. Data were linked at the individual level using an Anonymous Linkage Field



(ALF) to identify participants and link SARS-CoV-2 test results (figure 1). The RECORD checklist[33] for this study is presented in online supplemental appendix 2.

## Ethics

Ethical approval was granted by the Swansea University Medical School Research Ethics Committee (2017-0033H). Electronic data (survey responses) were stored in password-protected files only accessible to the research team. The routine data used in this study are available in the SAIL Databank and are subject to review by an independent Information Governance Review Panel (IGRP), to ensure proper and appropriate use of SAIL data. Before any data can be accessed, approval must be received from the IGRP. When access has been approved, it is accessed through a privacy-protecting safe haven and remote access system referred to as the SAIL Gateway. SAIL has established an application process to be followed by anyone who would like to access data. This study has been approved by the SAIL IGRP (project reference: 0911).

## The HAPPEN survey and linked SAIL data

All primary schools (n=1,203) in Wales, UK were invited to participate in the HAPPEN survey between 1 April 2014 and 28 February 2020 via a number of methods including email, social media promotion and through stakeholders in health and education (including local authority health and wellbeing teams, regional education consortia). Prior to 2018, HAPPEN was established in three of the local authorities (total n=22) in Wales. From 2018 to the period of interest, HAPPEN began its expansion to primary schools across Wales. Participating in HAPPEN is voluntary and this study comprises of a convenience sample of children attending

n=129 primary schools from 16 local authorities that participated in the HAPPEN survey during the period of interest (1 January 2018 and 28 February 2020). Schools were invited to share details of the survey with parents/guardians (including information sheets). To participate in the HAPPEN survey and link data to routine records, child assent was required in addition to parental consent (between 2014 to 2018) and opt-out parental consent (2019 onwards).

The HAPPEN survey is completed by children aged 8-11 as a self-guided activity within the school setting as a classroom activity with supervision from a teacher/teaching assistant. The survey takes approximately 30 minutes to complete and includes validated self-report measures of typical health behaviours including physical activity, screen time, nutrition, sleep and wellbeing[28]. A full copy of the survey can be found in online supplemental appendix 3 and items, response categories and the coding framework included within analyses in online supplemental appendix 4.

The process of data coding involved two researchers. The first (MJ) cleaned the raw data (including checking for duplicate entries), removed identifiable information and generated a unique participant ID number to protect participants' anonymity. The second (EM) researcher coded the anonymised raw dataset using STATA (version 16) to produce a dataset for analyses. This HAPPEN dataset was uploaded to the SAIL Databank, a trusted research environment (TRE) containing individual-level anonymised population-scale data sources about the population of Wales that enables secure data linkage and analysis for research, to be linked with SARS-CoV-2 testing data from the PATD dataset. To link the data, the person-based identifiable data are separated from the survey data and sent to a trusted third party, Digital Health and Care Wales (the national organisation that designs and builds digital services for health and social care in Wales). The survey data is sent to SAIL using a

secure file upload. A unique Anonymous Linking Field (ALF) is assigned to the person-based record before it is joined to clinical data via a system linking field. The ALF was used to link records at the individual level between the HAPPEN dataset and PATD dataset containing PCR testing data. This dataset was accessible to authors listed from the Population Data Science group, Swansea University.

## Quantitative analysis

The primary outcomes were i) whether the child was PCR tested for the SARS-CoV-2 virus and ii) whether the child had a positive SARS-CoV-2 test between 1 March 2020 and 31 August 2021. Participants were assigned a binary code for SARS-CoV-2 test during period of interest (1: tested at least once for SARS-CoV-2 between 1 March 2020 and 31 August 2021, 0: no evidence of PCR SARS-CoV-2 test) and again for a positive SARS-CoV-2 test during period of interest (1; testing positive for SARS-CoV-2 between 1 March 2020 and 31 August 2021, 0; testing negative, 0; no evidence of PCR test). Participants were assumed to have remained in Wales during the period of interest. Eligibility criteria (see cohort flow diagram, Figure 1) within final analyses models were any unique participant with complete linked survey and routine records. Inclusion dates of survey responses for analyses were between 1 January 2018 and 28 February 2020. Multivariable logistic regression analyses, adjusting for confounding variables (sex, age on 1 March 2020, area-level deprivation using the Welsh Index of Multiple Deprivation (WIMD)[34] (version 2019) and clustered by school (to account for differences between schools), determined Odds Ratios (OR) for i) ever being PCR-tested for SARS-CoV-2 virus and ii) ever having a positive PCR SARS-CoV-2 test during the period of interest.

Independent variables as measures of typical pre-pandemic health-related behaviours included within analyses were obtained retrospectively from the HAPPEN survey, completed between 1 January 2018 and 28 February 2020 (online supplemental appendix 4). Health-related behaviour measures included in multivariable analyses are recognised by the OECD as typical health behaviour trends during childhood that warrant research[4,5]. These related to the behaviours from the previous day (ate breakfast, travel actively to and/or from school, number of fruit/vegetables portions consumed, number of times teeth brushed, hours of sleep), frequency of behaviours every day the previous seven days (physically active  $\geq 60$  minutes, sedentary/screen time  $\geq$  two hours, felt tired, ate a sugary snack), and general items including participation in number of out of school clubs, can ride a bike and can swim 25 metres. A list of variables included in analyses, coding response categories and coding framework is presented in online supplemental appendix 4. Independent variables were entered concurrently and examined for association with the outcomes i) ever PCR-tested for SARS-CoV-2 and ii) ever tested positive for SARS-CoV-2 between 1 March 2020 and 31 August 2021.

### ***Figure 1: Cohort flow diagram***

## **Patient and public involvement**

The SAIL Databank has a Consumer Panel that provides the public's perspective on data linkage research. The Panel members are involved in all elements of the SAIL Databank process, from developing ideas, advising on bids through approval processes (via the

independent Information Governance Review Panel), to disseminating research findings. For more information visit <https://saildatabank.com/about-us/public-engagement/>.

## RESULTS

Survey responses were obtained from n=11,339 participants (figure 1). Survey responses outside the period of interest (before 01 January 2018 and after 28 February 2020) were excluded (n=3,698), followed by duplicate participants (occasions of multiple survey entries, n=579). In the case of duplicates, the most recent instance of survey participation was used. Complete linked unique records of participants meeting eligibility criteria were obtained for n=7,062 individuals. Table 1 presents the descriptive statistics of the study sample by ever PCR-tested for SARS-CoV-2 and ever tested positive for SARS-CoV-2 between 1 March 2020 and 31 August 2021. Of the total sample, 39.1% (n=2,764) were PCR-tested for SARS-CoV-2 and 8.1% (n=569) tested positive for SARS-CoV-2. The mean age on 1 March 2020 (start of period of interest) was 10.6 ( $\pm 0.9$ ) for those PCR-tested (table 1) and 10.6 ( $\pm 1.0$ ) for those tested positive for SARS-CoV-2 (table 2). Complete case analyses are presented. Unadjusted multivariable logistic regression analyses are presented in online supplemental appendix 5.

Table 1: Descriptive statistics of study sample by PCR-tested for SARS-CoV-2 and PCR test positive for SARS-CoV-2 between 1 March 2020 and 31 August 2021.

|                                     | Tested for SARS-CoV-2<br>n (%) | Not tested for SARS-CoV-2<br>n (%) | Tested positive for SARS-CoV-2<br>n (%) | No evidence of positive SARS-CoV-2 test<br>n (%) |
|-------------------------------------|--------------------------------|------------------------------------|-----------------------------------------|--------------------------------------------------|
| <b>Sample</b>                       | 39.1% (2,764)                  | 60.9% (4,298)                      | 8.1% (569)                              | 91.9% (6,498)                                    |
| <b>Age at time of HAPPEN survey</b> | 10.1 $\pm$ 0.8                 | 9.9 $\pm$ 0.9                      | 10.1 $\pm$ 0.8                          | 9.9 $\pm$ 0.8                                    |

|                                                                        |                                   |               |               |             |               |
|------------------------------------------------------------------------|-----------------------------------|---------------|---------------|-------------|---------------|
| <b>Age on<br/>01/03/2020<br/>(start of<br/>period of<br/>interest)</b> |                                   | 10.6 ± 0.9    | 10.3 ± 1.1    | 10.6 ± 1.0  | 10.4 ± 1.0    |
| <b>Sex</b>                                                             | <b>Boy</b>                        | 49.3% (1,363) | 46.7% (2,005) | 44.3% (252) | 48.0% (3,116) |
|                                                                        | <b>Girl</b>                       | 48.9% (1,352) | 51.8% (2,226) | 54.5% (310) | 50.3% (3,268) |
|                                                                        | <i>Missing</i>                    | 1.8% (49)     | 1.5% (67)     | 1.2% (7)    | 1.7% (109)    |
| <b>WIMD<br/>quintiles</b>                                              | <b>2019 1 (most<br/>deprived)</b> | 24.3% (672)   | 23.9% (1,025) | 28.5% (162) | 23.6% (1,535) |
|                                                                        | <b>2</b>                          | 19.9% (551)   | 19.02% (826)  | 19.7% (112) | 19.5% (1,265) |
|                                                                        | <b>3</b>                          | 16.5% (455)   | 17.4% (748)   | 17.6% (100) | 17.0% (1,103) |
|                                                                        | <b>4</b>                          | 15.6% (431)   | 15.8% (678)   | 14.1% (80)  | 15.9% (1,029) |
|                                                                        | <b>5 (least<br/>deprived)</b>     | 18.0% (497)   | 16.8% (771)   | 16.5% (94)  | 17.3% (1,124) |
|                                                                        | <i>Missing</i>                    | 5.7% (158)    | 7.0% (300)    | 3.7% (21)   | 6.7% (5437)   |

See online supplemental appendix 4 for variable codebook. Full descriptive statistics table presented in online supplemental appendix 5.

Table 2 presents the multivariable logistic regression for children ever PCR-tested for SARS-CoV-2 between 1 March 2020 and 31 August 2021. The model showed a low goodness-of-fit ( $R^2=0.02$ ). Children that reported to eat breakfast (OR=1.16, 95% CI 0.99 – 1.36, reference: did not eat breakfast,  $p<0.1$ ), consume sugary snacks on 1-2 days (1.24, 1.04 – 1.49) and 5-6 days (1.31, 1.07 – 1.61) compared to 0 days, participate in more out of school clubs (1.02, 1.00 – 1.04), able to ride a bike (1.15, 0.98 – 1.35, reference: cannot ride a bike,  $p<0.1$ ) and able to swim 25m (1.21, 1.06 – 1.39, reference: cannot swim 25m) were more likely to be PCR-tested for SARS-CoV-2. Older children (1.25, 1.16 – 1.35) were also more likely to be PCR-tested for SARS-CoV-2, and compared to quintile 1 (most deprived) those in WIMD quintiles 3 (0.85, 0.70 – 1.03,  $p<0.1$ ) and 5 (0.85, 0.72 – 1.02,  $p<0.1$ ) were less likely to be PCR-tested for SARS-CoV-2. Unadjusted multivariable logistic regression analyses are presented in online supplemental appendix 6.

Table 2: Multivariable logistic regression model of significant health behaviour markers and probability of ever being PCR-tested for SARS-CoV-2 between 1 March 2020 and 31 August 2021, accounting for baseline age, sex and deprivation, and clustered by school.

| PCR-tested for SARS-CoV-2<br>(n=6,403, $R^2=0.02$ )                                        | OR    | p value | 95% CI      |
|--------------------------------------------------------------------------------------------|-------|---------|-------------|
| <b>Ate breakfast</b>                                                                       | 1.16* | 0.067   | 0.99 – 1.36 |
| <i>Reference: did not eat breakfast</i>                                                    | 1.00  |         |             |
| <b>Active travel to school</b>                                                             | 0.93  | 0.339   | 0.80 – 1.08 |
| <i>Reference: did not active travel to school</i>                                          | 1.00  |         |             |
| <b>Active travel from school</b>                                                           | 1.01  | 0.901   | 0.86 – 1.19 |
| <i>Reference: did not active travel from school</i>                                        | 1.00  |         |             |
| <b>Number of fruit/vegetable portions</b>                                                  | 1.00  | 0.959   | 0.97 – 1.03 |
| <i>Reference: 0 fruit/vegetable portions</i>                                               | 1.00  |         |             |
| <b>Number of times teeth brushed</b>                                                       | 0.94  | 0.229   | 0.86 – 1.04 |
| <i>Reference: did not brush teeth</i>                                                      | 1.00  |         |             |
| <b>Sleep hours</b>                                                                         | 1.01  | 0.682   | 0.97 – 1.04 |
| <i>Reference: 0 days physically active <math>\geq</math> 60 mins (previous seven days)</i> |       |         |             |

|                                                                      |        |       |             |
|----------------------------------------------------------------------|--------|-------|-------------|
| <b>1-2 days physically active ≥ 60 mins</b>                          | 1.14   | 0.250 | 0.91 – 1.41 |
| <b>3-4 days physically active ≥ 60 mins</b>                          | 1.13   | 0.257 | 0.91 – 1.39 |
| <b>5-6 days physically active ≥ 60 mins</b>                          | 1.16   | 0.217 | 0.92 – 1.45 |
| <b>7 days physically active ≥ 60 mins</b>                            | 1.10   | 0.451 | 0.86 – 1.39 |
| <i>Reference: 0 days sedentary ≥ two hours (previous seven days)</i> | 1.00   |       |             |
| <b>1-2 days sedentary ≥ two hours</b>                                | 1.20   | 0.141 | 0.94 – 1.54 |
| <b>3-4 days sedentary ≥ two hours</b>                                | 1.18   | 0.198 | 0.92 – 1.52 |
| <b>5-6 days sedentary ≥ two hours</b>                                | 1.16   | 0.333 | 0.86 – 1.56 |
| <b>7 days sedentary ≥ two hours</b>                                  | 1.16   | 0.243 | 0.90 – 1.48 |
| <i>Reference: 0 days felt tired (previous seven days)</i>            | 1.00   |       |             |
| <b>1-2 days felt tired</b>                                           | 0.97   | 0.686 | 0.85 – 1.12 |
| <b>3-4 days felt tired</b>                                           | 1.00   | 0.963 | 0.85 – 1.16 |
| <b>5-6 days felt tired</b>                                           | 1.07   | 0.528 | 0.86 – 1.33 |
| <b>7 days felt tired</b>                                             | 0.97   | 0.728 | 0.93 – 1.14 |
| <i>Reference: 0 days consumed sugary snack (previous seven days)</i> | 1.00   |       |             |
| <b>1-2 days consumed sugary snack</b>                                | 1.24** | 0.018 | 1.04 – 1.49 |
| <b>3-4 days consumed sugary snack</b>                                | 1.12   | 0.301 | 0.91 – 1.37 |
| <b>5-6 days consumed sugary snack</b>                                | 1.31** | 0.008 | 1.07 – 1.61 |
| <b>7 days consumed sugary snack</b>                                  | 1.16   | 0.170 | 0.94 – 1.43 |
| <b>Number of out of school clubs participation</b>                   | 1.02*  | 0.099 | 1.00 – 1.04 |
| <b>Can ride a bike</b>                                               | 1.15*  | 0.086 | 0.98 – 1.35 |
| <i>Reference: cannot ride a bike</i>                                 | 1.00   |       |             |
| <b>Can swim 25m</b>                                                  | 1.21** | 0.006 | 1.06 – 1.39 |
| <i>Reference: cannot swim 25m</i>                                    | 1.00   |       |             |
| <b>Age 01/03/2020</b>                                                | 1.25** | 0.000 | 1.16 – 1.35 |
| <b>Sex (girl)</b>                                                    | 0.92   | 0.161 | 0.81 – 1.04 |
| <i>Reference: sex (boy)</i>                                          | 1.00   |       |             |
| <i>Reference: WIMD 2019 quintile 1 (most deprived)</i>               | 1.00   |       |             |
| <b>WIMD 2019 quintile 2</b>                                          | 0.95   | 0.600 | 0.80 – 1.14 |
| <b>WIMD 2019 quintile 3</b>                                          | 0.85*  | 0.090 | 0.70 – 1.03 |
| <b>WIMD 2019 quintile 4</b>                                          | 0.87   | 0.131 | 0.73 – 1.04 |
| <b>WIMD 2019 quintile 5 (least deprived)</b>                         | 0.85*  | 0.078 | 0.72 – 1.02 |

OR: Odds Ratio; 95% CI: 95% confidence intervals; \*\*p<0.05, \*p<0.1. See online supplemental appendix 4 for variable codebook. Low to moderate correlation between variables (coefficients -0.19 to 0.71).

Table 3 presents the multivariable logistic regression for children ever PCR-tested positive for SARS-CoV-2 between 1 March 2020 and 31 August 2021. Children were more likely to test positive for SARS-CoV-2 if reporting to eat breakfast (OR=1.52, 95% CI 1.01 – 2.27, reference:



did not eat breakfast), be physically active for  $\geq 60$  mins on 1-2 days (1.69, 1.04 – 2.74), 3-4 days (1.76, 1.10 – 2.82) and 5-6 days (1.59, 0.93 – 2.73,  $p < 0.1$ ) compared to 0 days, participate in more out of school clubs (1.06, 1.02 – 1.10) and able to ride a bike (1.39, 1.00 – 1.93, reference: cannot ride a bike). Older children (1.16, 1.05 – 1.28) were more likely to test positive for SARS-CoV-2. Compared to boys, girls were more likely to test positive (1.21, 1.00 – 1.46), and compared to the most deprived quintile 1, those living in the least deprived quintiles 4 (0.64, 0.46 – 0.90) and 5 (0.64, 0.46 – 0.89) were less likely to test positive for SARS-CoV-2. The model showed a low goodness-of-fit ( $R^2=0.02$ ). Unadjusted multivariable logistic regression analyses are presented in online supplemental appendix 6.

Table 3: Multivariable logistic regression model of significant health behaviour markers and probability of ever PCR-testing positive for SARS-CoV-2 between 1 March 2020 and 31 August 2021, accounting for baseline age, sex and deprivation, and clustered by school.

| PCR test positive for SARS-CoV-2<br>(n=6,403, $R^2=0.02$ )                                 | OR     | p value | 95% CI      |
|--------------------------------------------------------------------------------------------|--------|---------|-------------|
| <b>Ate breakfast</b>                                                                       | 1.52** | 0.043   | 1.01 – 2.27 |
| <i>Reference: did not eat breakfast</i>                                                    | 1.00   |         |             |
| <b>Active travel to school</b>                                                             | 0.91   | 0.481   | 0.70 – 1.18 |
| <i>Reference: did not active travel to school</i>                                          | 1.00   |         |             |
| <b>Active travel from school</b>                                                           | 0.98   | 0.910   | 0.72 – 1.33 |
| <i>Reference: did not active travel from school</i>                                        | 1.00   |         |             |
| <b>Number of fruit/vegetable portions</b>                                                  | 0.98   | 0.461   | 0.94 – 1.03 |
| <i>Reference: 0 fruit/vegetable portions</i>                                               | 1.00   |         |             |
| <b>Number of times teeth brushed</b>                                                       | 1.05   | 0.542   | 0.90 – 1.21 |
| <i>Reference: did not brush teeth</i>                                                      | 1.00   |         |             |
| <b>Sleep hours</b>                                                                         | 0.97   | 0.345   | 0.92 – 1.03 |
| <i>Reference: 0 days physically active <math>\geq 60</math> mins (previous seven days)</i> | 1.00   |         |             |
| <b>1-2 days physically active <math>\geq 60</math> mins</b>                                | 1.69** | 0.035   | 1.04 – 2.74 |
| <b>3-4 days physically active <math>\geq 60</math> mins</b>                                | 1.76** | 0.018   | 1.10 – 2.82 |
| <b>5-6 days physically active <math>\geq 60</math> mins</b>                                | 1.59*  | 0.091   | 0.93 – 2.73 |
| <b>7 days physically active <math>\geq 60</math> mins</b>                                  | 1.50   | 0.158   | 0.85 – 2.65 |
| <i>Reference: 0 days sedentary <math>\geq</math> two hours (previous seven days)</i>       | 1.00   |         |             |
| <b>1-2 days sedentary <math>\geq</math> two hours</b>                                      | 0.96   | 0.847   | 0.63 – 1.47 |
| <b>3-4 days sedentary <math>\geq</math> two hours</b>                                      | 0.94   | 0.789   | 0.59 – 1.50 |

|                                                                      |        |       |             |
|----------------------------------------------------------------------|--------|-------|-------------|
| <b>5-6 days sedentary <math>\geq</math> two hours</b>                | 0.93   | 0.803 | 0.51 – 1.68 |
| <b>7 days sedentary <math>\geq</math> two hours</b>                  | 1.02   | 0.946 | 0.63 – 1.65 |
| <i>Reference: 0 days felt tired (previous seven days)</i>            | 1.00   |       |             |
| <b>1-2 days felt tired</b>                                           | 1.17   | 0.207 | 0.91 – 1.51 |
| <b>3-4 days felt tired</b>                                           | 1.17   | 0.232 | 0.91 – 1.50 |
| <b>5-6 days felt tired</b>                                           | 1.19   | 0.243 | 0.89 – 1.60 |
| <b>7 days felt tired</b>                                             | 0.89   | 0.390 | 0.68 – 1.16 |
| <i>Reference: 0 days consumed sugary snack (previous seven days)</i> | 1.00   |       |             |
| <b>1-2 days consumed sugary snack</b>                                | 1.13   | 0.523 | 0.77 – 1.65 |
| <b>3-4 days consumed sugary snack</b>                                | 1.06   | 0.783 | 0.70 – 1.61 |
| <b>5-6 days consumed sugary snack</b>                                | 1.36   | 0.159 | 0.89 – 2.08 |
| <b>7 days consumed sugary snack</b>                                  | 1.08   | 0.727 | 0.71 – 1.63 |
| <b>Number of out of school clubs participation</b>                   | 1.06** | 0.002 | 1.02 – 1.10 |
| <b>Can ride a bike</b>                                               | 1.39** | 0.049 | 1.00 – 1.93 |
| <i>Reference: cannot ride a bike</i>                                 | 1.00   |       |             |
| <b>Can swim 25m</b>                                                  | 1.14   | 0.324 | 0.88 – 1.48 |
| <i>Reference: cannot swim 25m</i>                                    |        |       |             |
| <b>Age 01/03/2020</b>                                                | 1.16** | 0.003 | 1.05 – 1.28 |
| <b>Sex (girl)</b>                                                    | 1.21** | 0.046 | 1.00 – 1.46 |
| <i>Reference: sex (boy)</i>                                          | 1.00   |       |             |
| <i>Reference: WIMD 2019 quintile 1 (most deprived)</i>               | 1.00   |       |             |
| <b>WIMD 2019 quintile 2</b>                                          | 0.79   | 0.113 | 0.59 – 1.06 |
| <b>WIMD 2019 quintile 3</b>                                          | 0.79   | 0.128 | 0.59 – 1.07 |
| <b>WIMD 2019 quintile 4</b>                                          | 0.64** | 0.009 | 0.46 – 0.90 |
| <b>WIMD 2019 quintile 5</b>                                          | 0.64** | 0.007 | 0.46 – 0.89 |

OR: Odds Ratio; 95% CI: 95% confidence intervals; \*\*p<0.05, \*p<0.1. See online supplemental appendix 4 for variable codebook. Low to moderate correlation between variables (coefficients -0.19 to 0.71).

## DISCUSSION

This study examines whether markers of health-related behaviours reported by primary school-aged children between January 2018 and February 2020 are associated with the likelihood of being PCR-tested for SARS-CoV-2 and testing positive between 1 March 2020 and 31 August 2021. Findings suggest that reporting to eat breakfast, weekly sugary snack

consumption (both low and high), participating in more out of school clubs, being able to ride a bike and being able to swim 25 metres were associated with an increased likelihood of being tested for SARS-CoV-2. Health behaviours associated with an increased likelihood of testing positive for SARS-CoV-2 were eating breakfast, engaging in higher weekly physical activity, participating in more out of school clubs and riding a bike. Boys were more likely to test positive for SARS-CoV-2 than girls, and those living in a less deprived area less likely to test positive than those residing in the most deprived area.

This study encompasses a period of both targeted and mass PCR testing, and detecting child positive cases using routine PCR testing data in this study requires a parent/guardian to take the child for testing. We find associations between child-reported health-related behaviours with both PCR-testing for SARS-CoV-2 and testing positive for SARS-CoV-2. Through this, we theorise that because health behaviours are largely guided and facilitated by parents, our associations are likely to be reflecting health literacy among parents, along with monitoring behaviours. In the case of symptomatic testing, the detection of positive child cases relies on parents recognising symptoms and communication with their child. For asymptomatic testing through the use of LFT (e.g. asymptomatic school testing between February and April 2021), guidance encouraged positive LFTs to be followed up with PCR-testing, requiring knowledge of how to access testing services and ability to access services (e.g. transport). These behaviours form a level of health literacy, recognised as the ability to access, understand, interpret and apply medical information and make informed decisions regarding medical advice, issues or guidelines[35]. Parental health literacy impacts the decision a parent makes relating to their child[36] and is correlated with a number of health indicators including knowledge of health and health services, and the parent and child engaging in health-promoting behaviours[8,35].

Parenting is an important contributor to promoting positive health behaviours in children, and is represented by a constellation of attitudes, behaviours and values for the child. The presence of multiple physically active behaviours represented by the association of being able to swim, ride a bike and participation in more out of school clubs may represent underlying parental involvement and modelling behaviour, including involvement in leisure time activities, providing financial and transport provision to attend organised activities such as access to swimming lessons and the provision of equipment[7]. This may also have a socioeconomic component, building on the ideas of Bourdieu in terms of social capital, and access health enhancing material items[37].

Diet-related findings of eating breakfast and restrictive weekly sugary snack consumption (1-2 days per week) may indicate higher parental monitoring, supporting our theory. In comparison, higher weekly sugary snack consumption (5-6 days per week) may represent less restrictive parental monitoring and more autonomy and choice for the child. We posit that as parental behaviours are often driven by underlying styles of parenting[38], the associations could be depicting varying levels of control; for instance, those snacking 1-2 times perhaps have parents with greater control, vs. those snacking 5-6 times with parents with less controlling styles. This theory may well transcend into other behaviours, including limits and freedom in socialising with others, placing a greater risk for infection of illness – including COVID-19.

While evidence recognises the importance of adequate nutrition[16] and physical activity[17] for cardiometabolic health and immune system function, the findings in the current study draw attention to another potential mechanism of increased contacts and exposure to SARS-CoV-2. Engagement in physically active behaviours such as out of school clubs, higher frequency of physically active days in a week and riding a bike may increase the

number of social contacts of the child. Indeed, there is a wealth of evidence demonstrating that childhood physical activity participation is highly influenced by their social environment and co-participation with peers[39]. It is therefore possible that physically active children had increased social contacts and exposure to SARS-CoV-2 through co-participation of activity and play opportunities.

However, it is important to note that physical activity is an essential health behaviour required for optimal development and a range of health and wellbeing outcomes. These findings must be considered in balance with the importance of encouraging these behaviours and providing physically active opportunities during childhood. This viewpoint was also reflected in Government guidance and risk assessments during the COVID-19 pandemic through the reopening of children's playgrounds and outdoor play spaces, with explicit reference to outdoor play and physical activity as fundamental for children's development and wellbeing[40].

Contact patterns may also explain sex differences observed in this study, as we found girls are more likely to test positive for SARS-CoV-2. In addition to age assortative mixing patterns of children, there is a developmental tendency by children to socially interact with members of the same sex and engage in gender-typed activity[41]. For girls, the location of play preferences are more likely to be indoors and in contact with supervising adults, where exposure to SARS-CoV-2 is possibly greater[42]. The findings of association between increasing age and likelihood of testing positive for SARS-CoV-2 in this study are supported by wider literature which suggests increasing susceptibility of infection in the adolescent age group compared to younger than 10 to 14 years[43].

Our findings also show an area-level social gradient. Those living in the least deprived WIMD quintiles 4 and 5 were less likely to test positive for SARS-CoV-2 compared to the most

deprived quintile, which may reflect deprivation-related exposure patterns to SARS-CoV-2. Indeed, research conducted using the WIMD and English area-level deprivation indicators found adults living in the most deprived areas demonstrated differential exposures to SARS-CoV-2[44]. This included patterns of public activities such as attending work or education outside of the household, using public transport and car sharing with non-household members. This, and considerations of the deprivation-related disparities in the built environment including access to open spaces highlight the inequalities that persist in risk of SARS-CoV-2 infection. Furthermore, whilst it is likely that children mix with others from similar demographic areas, the finding in our study may also reflect community prevalence which was not captured.

## CONCLUSION

We theorise that health-promoting behaviours associated with a child being tested for SARS-CoV-2 and being identified as positive may be a proxy of higher parental health literacy and monitoring behaviours. Furthermore, co-participation in physically active behaviours with peers may increase exposure to SARS-CoV-2. This must be considered from a risk versus benefit approach in relation to the importance of physically active behaviours for children's development and wellbeing.

## Acknowledgements

The authors would like to thank all participating primary schools and pupils that took part in this study. This work was supported by the National Centre for Population Health and Wellbeing Research through the HAPPEN network. This study makes use of anonymised data held in the Secure Anonymised Information Linkage (SAIL) Databank. We would like to acknowledge all the data providers who make anonymised data available for research. We would also like to thank Dr Annemarie Docherty and Dr Olivia Swann from The University of Edinburgh for providing informal peer review input to the final draft.

## Availability for data and materials

The routine data used in this study are available in the SAIL Databank at Swansea University, Swansea, UK. All proposals to use SAIL data are subject to review by an IGRP. Before any data can be accessed, approval must be given by the IGRP. The IGRP gives careful consideration to each project to ensure proper and appropriate use of SAIL data. When access has been approved, it is gained through a privacy-protecting safe haven and remote access system referred to as the SAIL Gateway. SAIL has established an application process to be followed by anyone who would like to access data via SAIL <https://www.saildatabank.com/application-process>. This study has been approved by the IGRP as project 0911.

## Funding

The Economic and Social Research Council (ESRC) funded the development of the HAPPEN network (grant number: ES/J500197/1) which this research was conducted through. The National Centre for Population Health and Wellbeing Research (NCPHWR) funded by Health

and Care Research Wales provided infrastructural support for this work. This work was supported by the Con-COV team funded by the Medical Research Council (grant number: MR/V028367/1). This work was supported by Health Data Research UK, which receives its funding from HDR UK Ltd (HDR-9006) funded by the UK Medical Research Council, Engineering and Physical Sciences Research Council, Economic and Social Research Council, Department of Health and Social Care (England), Chief Scientist Office of the Scottish Government Health and Social Care Directorates, Health and Social Care Research and Development Division (Welsh Government), Public Health Agency (Northern Ireland), British Heart Foundation (BHF) and the Wellcome Trust. This work was a collaboration with the ADR Wales programme of work. ADR Wales is part of the Economic and Social Research Council (part of UK Research and Innovation) funded ADR UK (grant ES/S007393/1). This work was supported by the Wales COVID-19 Evidence Centre, funded by Health and Care Research Wales and by the COVID-19 Longitudinal Health and Wellbeing National Core Study funded by the Medical Research Council (MC\_PC\_20030).

## Transparency statement

The lead author affirms that the manuscript is an honest, accurate, and transparent account of the study being reported; that no important aspects of the study have been omitted; and that any discrepancies from the study as originally planned have been explained.

## Competing interests

The authors declare that they have no competing interests.



## Contributorship statement

EM and SB conceptualised the study design. EM and MJ acquired the data, and EM and JK were responsible for data curation. EM performed the statistical analysis, undertook the initial interpretation of the data and wrote the initial draft. EL and SB contributed to the writing of the manuscript and provided statistical guidance. EL, JK, SB, LC and RL provided critical interpretation of the data. The manuscript was critically reviewed and edited by EL, TC, LG, RF, KD, OO, MJ, LC, FT, JK, AA, RL and SB. SB provided supervision and TC and LG provided mentorship. EM is the guarantor. AD and OS critically reviewed the initial manuscript. EM, EL, TC, LG, RF, KD, OO, MJ, LC, FT, JK, AA, RL and SB approved the final manuscript and agreed to be accountable for all aspects of the work.

## References

- 1 James M, Marchant E, Defeyter MA, *et al.* Impact of school closures on the health and well-being of primary school children in Wales UK: a routine data linkage study using the HAPPEN Survey (2018-2020). *BMJ Open* 2021;**11**. doi:10.1136/BMJOPEN-2021-051574
- 2 Marchant E, Todd C, James M, *et al.* Primary school staff perspectives of school closures due to COVID-19, experiences of schools reopening and recommendations for the future: A qualitative survey in Wales. *PLoS One* 2021;**16**:e0260396. doi:10.1371/JOURNAL.PONE.0260396
- 3 Craigie AM, Lake AA, Kelly SA, *et al.* Tracking of obesity-related behaviours from childhood to adulthood: A systematic review. *Maturitas* 2011;**70**:266–84.

- doi:10.1016/j.maturitas.2011.08.005
- 4 OECD. 'Are children active and physically healthy?',. In: *Measuring What Matters for Child Well-Being and Policies*. Paris: : OECD Publishing 2021. 1–295.  
doi:10.1787/e82fded1-en
- 5 OECD. Education in the Digital Age. In: Burns T, Gottschalk F, eds. *Education in the Digital Age*. OECD 2020. 1–218. doi:10.1787/1209166A-EN
- 6 Pyper E, Harrington D, Manson H. The impact of different types of parental support behaviours on child physical activity, healthy eating, and screen time: a cross-sectional study. Published Online First: 2016. doi:10.1186/s12889-016-3245-0
- 7 Edwardson CL, Gorely T. Parental influences on different types and intensities of physical activity in youth: A systematic review. *Psychol Sport Exerc* 2010;**11**:522–35.  
doi:10.1016/j.psychsport.2010.05.001
- 8 Pawellek M, Kopf FM, Egger N, *et al*. Pathways linking parental health literacy with health behaviours directed at the child: a scoping review. *Health Promot Int* 2021;**2021**:1–29. doi:10.1093/HEAPRO/DAAB154
- 9 Moore SA, Faulkner G, Rhodes RE, *et al*. Impact of the COVID-19 virus outbreak on movement and play behaviours of Canadian children and youth: A national survey. *Int J Behav Nutr Phys Act* 2020;**17**. doi:10.1186/s12966-020-00987-8
- 10 Chowdhury R, Van Daalen KR, Franco OH. Cardiometabolic Health: Key in Reducing Adverse COVID-19 Outcomes. *Glob Heart* 2020;**15**:58. doi:10.5334/gh.879
- 11 Koch R, Jordan S, Starker A, *et al*. Health behaviour and COVID-19: Initial findings on the pandemic Journal of Health Monitoring 2. *J Heal Monit* 2020;**2020**:1–14.  
doi:10.25646/7055
- 12 Childs CE, Calder PC, Miles EA. Diet and Immune Function. *Nutrients* 2019;**11**.

doi:10.3390/nu11081933

- 13 Lange KW, Nakamura Y. Lifestyle factors in the prevention of COVID-19. *Glob Heal J* 2020;**4**:146–52. doi:10.1016/J.GLOHJ.2020.11.002
- 14 Chastin SFM, Abaraogu U, Bourgois JG, *et al.* Effects of Regular Physical Activity on the Immune System, Vaccination and Risk of Community-Acquired Infectious Disease in the General Population: Systematic Review and Meta-Analysis. *Sports Med* 2021;**51**:1673. doi:10.1007/S40279-021-01466-1
- 15 Furman D, Campisi J, Verdin E, *et al.* Chronic inflammation in the etiology of disease across the life span. *Nat Med* 2019 2512 2019;**25**:1822–32. doi:10.1038/s41591-019-0675-0
- 16 Wintergerst ES, Maggini S, Hornig DH. Contribution of selected vitamins and trace elements to immune function. *Ann Nutr Metab* 2007;**51**:301–23. doi:10.1159/000107673
- 17 Laddu DR, Lavie CJ, Phillips SA, *et al.* Physical activity for immunity protection: Inoculating populations with healthy living medicine in preparation for the next pandemic. *Prog Cardiovasc Dis* 2021;**64**:102–4. doi:10.1016/J.PCAD.2020.04.006
- 18 Hamer M, Kivimäki M, Gale C, *et al.* Lifestyle risk factors, inflammatory mechanisms, and COVID-19 hospitalization: A community-based cohort study of 387,109 adults in UK. *Brain Behav Immun* 2020;**87**:184–7. doi:10.1016/J.BBI.2020.05.059
- 19 Lee SW, Lee J, Moon SY, *et al.* Physical activity and the risk of SARS-CoV-2 infection, severe COVID-19 illness and COVID-19 related mortality in South Korea: a nationwide cohort study. *Br J Sports Med* 2021;**0**:18. doi:10.1136/BJSPORTS-2021-104203
- 20 Zhou B, Yuan Y, Wang S, *et al.* Risk profiles of severe illness in children with COVID-19: a meta-analysis of individual patients. *Pediatr Res* 2021 902 2021;**90**:347–52.

doi:10.1038/s41390-021-01429-2

- 21 Shekerdemian LS, Mahmood NR, Wolfe KK, *et al.* Characteristics and Outcomes of Children With Coronavirus Disease 2019 (COVID-19) Infection Admitted to US and Canadian Pediatric Intensive Care Units. *JAMA Pediatr* 2020;**174**:868–73. doi:10.1001/JAMAPEDIATRICS.2020.1948
- 22 Castagnoli R, Votto M, Licari A, *et al.* Severe Acute Respiratory Syndrome Coronavirus 2 (SARS-CoV-2) Infection in Children and Adolescents: A Systematic Review. *JAMA Pediatr* 2020;**174**:882–9. doi:10.1001/JAMAPEDIATRICS.2020.1467
- 23 OECD. Combatting COVID-19’s effect on children - OECD. 2020.<https://www.oecd.org/coronavirus/policy-responses/combating-covid-19-s-effect-on-children-2e1f3b2f/> (accessed 1 Oct 2021).
- 24 Senedd Research. Coronavirus timeline: Welsh and UK governments’ response – IN BRIEF. 2020.<https://seneddresearch.blog/2020/03/19/covid-19-timeline-welsh-and-uk-governments-response/> (accessed 30 Mar 2022).
- 25 Todd, C., Christian, D., Tyler, R., Stratton, G., Brophy S. Developing HAPPEN (Health and Attainment of Pupils involved in a Primary Education Network): working in partnership to improve child health and education. *Perspect Public Health* 2016;**136**:115–6.
- 26 Christian D, Todd C, Davies H, *et al.* Community led active schools programme (CLASP) exploring the implementation of health interventions in primary schools: headteachers’ perspectives. *BMC Public Health* 2015;**15**:238. doi:10.1186/s12889-015-1557-0
- 27 Todd C, Christian D, Davies H, *et al.* Headteachers’ prior beliefs on child health and their engagement in school based health interventions: a qualitative study. *BMC Res Notes* 2015;**18**:161. doi:10.1186/s13104-015-1091-2

- 28 Everson B, Mackintosh KA, McNarry MA, *et al.* Can Wearable Cameras be Used to Validate School-Aged Children's Lifestyle Behaviours? *Children* 2019;**6**:20. doi:10.3390/children6020020
- 29 Department of Health & Social Care. COVID-19 testing data: methodology note - GOV.UK. 2020.<https://www.gov.uk/government/publications/coronavirus-covid-19-testing-data-methodology/covid-19-testing-data-methodology-note> (accessed 30 Mar 2022).
- 30 Ford D V., Jones KH, Verplancke JP, *et al.* The SAIL Databank: Building a national architecture for e-health research and evaluation. *BMC Health Serv Res* 2009;**9**. doi:10.1186/1472-6963-9-157
- 31 Jones KH, Ford DV, Thompson S, *et al.* A Profile of the SAIL Databank on the UK Secure Research Platform. *Int J Popul Data Sci* 2019;**4**. doi:10.23889/ijpds.v4i2.1134
- 32 Lyons J, Akbari A, Torabi F, *et al.* Understanding and responding to COVID-19 in Wales: protocol for a privacy-protecting data platform for enhanced epidemiology and evaluation of interventions. *BMJ Open* 2020;**10**:43010. doi:10.1136/bmjopen-2020-043010
- 33 Benchimol EI, Smeeth L, Guttman A, *et al.* The REporting of studies Conducted using Observational Routinely-collected health Data (RECORD) Statement. *PLOS Med* 2015;**12**:e1001885. doi:10.1371/JOURNAL.PMED.1001885
- 34 Welsh Government. Welsh Index of Multiple Deprivation. 2019.<https://gov.wales/welsh-index-multiple-deprivation-full-index-update-ranks-2019>
- 35 Sørensen K, Van den Broucke S, Fullam J, *et al.* Health literacy and public health: A systematic review and integration of definitions and models. Published Online First:

2012. doi:10.1186/1471-2458-12-80
- 36 Morrison AK, Glick A, Yin HS. Health Literacy: Implications for Child Health. *Pediatr Rev* 2019;**40**:263–77. doi:10.1542/PIR.2018-0027
- 37 Bourdieu P. The Forms of Capital. In: *Handbook of Theory and Research for the Sociology of Education*. New York: : Greenwood 1986. 241–58.
- 38 Darling N, Steinberg L. Parenting Style as Context: An Integrative Model. *Psychol Bull* 1993;**113**:487–96. doi:10.1037/0033-2909.113.3.487
- 39 Li L, Moosbrugger ME. Correlations between Physical Activity Participation and the Environment in Children and Adolescents: A Systematic Review and Meta-Analysis Using Ecological Frameworks. *Int J Environ Res Public Heal* 2021, Vol 18, Page 9080 2021;**18**:9080. doi:10.3390/IJERPH18179080
- 40 Welsh Government. Reopening children’s playgrounds and outdoor play areas: coronavirus. Guidance for those in charge of playgrounds or outdoor play areas to keep children safe during the coronavirus pandemic. 2020. <https://gov.wales/reopening-childrens-playgrounds-and-outdoor-play-areas-coronavirus-html> (accessed 25 Apr 2022).
- 41 Mehta CM, Strough JN. Sex segregation in friendships and normative contexts across the life span. *Dev Rev* 2009;**29**:201–20. doi:10.1016/J.DR.2009.06.001
- 42 Edwards CP, Knoche L, Kumru A. Play Patterns and Gender. *Encycl women Gend Sex similarities Differ impact Soc Gend* 2001;:809–15.<http://digitalcommons.unl.edu/psychfacpub/607/> (accessed 25 Apr 2022).
- 43 Viner RM, Mytton OT, Bonell C, *et al*. Susceptibility to SARS-CoV-2 Infection among Children and Adolescents Compared with Adults: A Systematic Review and Meta-analysis. *JAMA Pediatr*. 2020. doi:10.1001/jamapediatrics.2020.4573

- 44 Beale S, Braithwaite I, Navaratnam AM, *et al.* Deprivation and exposure to public activities during the COVID-19 pandemic in England and Wales. *J Epidemiol Community Heal* 2022;**76**:319–26. doi:10.1136/jech-2021-217076

Figure 1: Cohort flow diagram

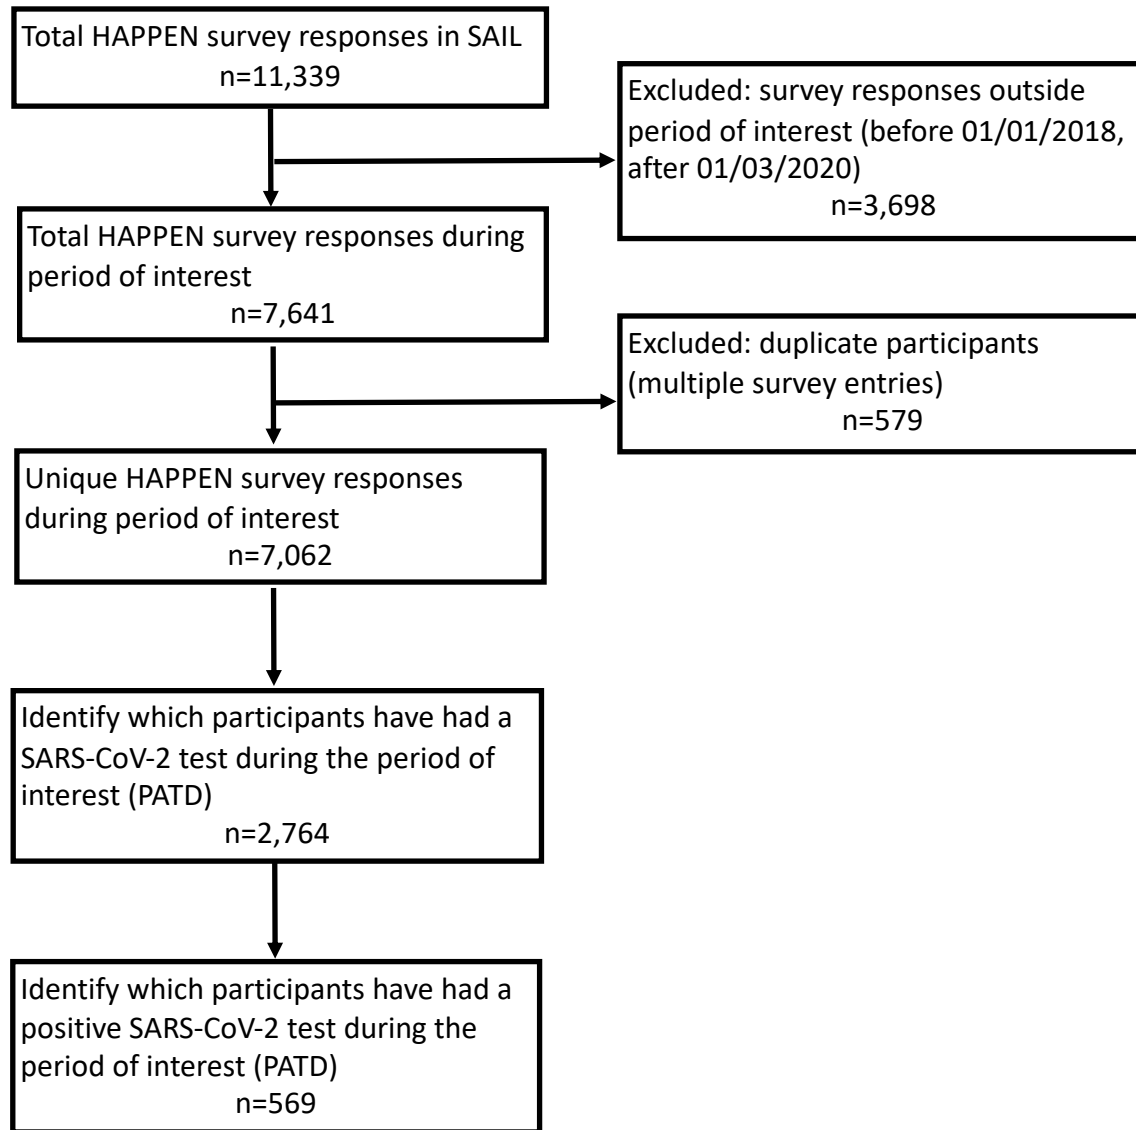

Source: https://www.medrxiv.org/content/10.1101/2022.01.21.22269651v2.full.pdf
