# Supplementary material for: Pre-COVID-19 pandemic health-related behaviours in children (2018-2020) and association with being tested for SARS-CoV-2 and testing positive for SARS-CoV-2 (2020-2021): a retrospective cohort study using survey data linked with routine health data in Wales, UK
Source: bioRxiv or medRxiv preprint supplement (doi:10.1101/2022.01.21.22269651), 2022-04-29
Supplement: Supplementary file [file media-3.pdf]

# THE HAPPEN SURVEY

\* Required

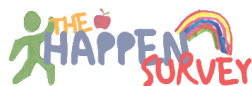

## Consent Form

Before you start please click this link to read the information sheet -> <https://happen-wales.co.uk/wp-content/uploads/2019/02/Child-Consent-2019.pdf>

1. I have read the child information sheet -> <https://happen-wales.co.uk/wp-content/uploads/2019/02/Child-Consent-2019.pdf> (click the link if you haven't read it) and understand that if I take part I can change my mind at any time, and this will not be a problem at all. \*

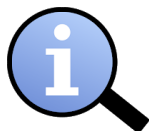

Mark only one oval.

- ☐ Yes  
☐ No

2. I am happy for you to use my questionnaire for research. Only the researchers in the team will know my name and will not tell anyone else my answers \*

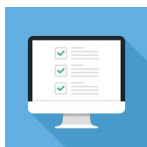

Mark only one oval.

- ☐ Yes  
☐ No do not use my questionnaire

3. I am happy for you to look at my school and health records to see how my school is doing (as a group). This is anonymous which means I cannot be identified \*

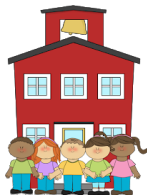

Mark only one oval.

- ☐ Yes  
☐ No

If you do not wish to take part in the questionnaire please do not continue.

Please click next to start the questionnaire!

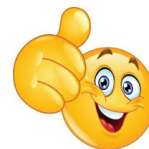

## About You

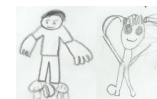

4. First Name \*

5. Last Name \*

6. Home Post Code \*

7. What school do you go to? \*

8. What year are you in? \*

Mark only one oval.

- ☐ Year 4  
☐ Year 5  
☐ Year 6  
☐ Year 7

9. Gender \*

Mark only one oval.

- ☐ Boy  
☐ Girl  
☐ Prefer not to say

## Date of Birth

10. Year \*

Mark only one oval.

- ☐ 2007  
☐ 2008  
☐ 2009  
☐ 2010  
☐ 2011  
☐ 2012

11. Month \*

Mark only one oval.

- ☐ January  
☐ February  
☐ March  
☐ April  
☐ May  
☐ June  
☐ July  
☐ August  
☐ September  
☐ October  
☐ November  
☐ December

12. Day \*

Mark only one oval.

- ☐ 1  
☐ 2  
☐ 3  
☐ 4  
☐ 5  
☐ 6  
☐ 7  
☐ 8  
☐ 9  
☐ 10  
☐ 11  
☐ 12  
☐ 13  
☐ 14  
☐ 15  
☐ 16  
☐ 17  
☐ 18  
☐ 19  
☐ 20  
☐ 21  
☐ 22  
☐ 23  
☐ 24  
☐ 25  
☐ 26  
☐ 27  
☐ 28  
☐ 29  
☐ 30  
☐ 31

13. 1. What did you eat for breakfast YESTERDAY? \*

Check all that apply.

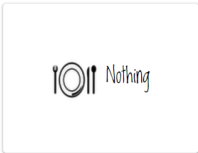

☐ Nothing

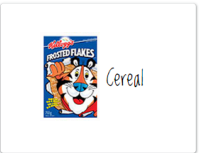

☐ Sugary cereal e.g. cocopops, frosties, sugar puffs, chocolate cereals

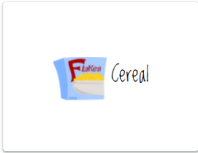

☐ Healthy cereal e.g. porridge, weetabix, readybrek, muesli, branflakes, cornflakes

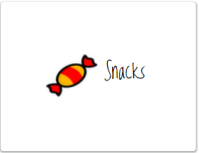

☐ Snacks

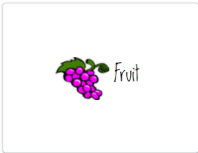

☐ Fruit

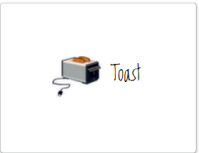

☐ Toast

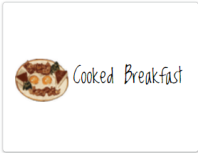

☐ Cooked breakfast

Other:

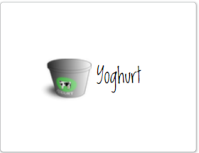

☐ Yoghurt

YESTERDAY

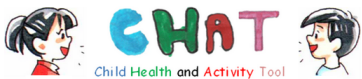

Firstly, think carefully about what you did YESTERDAY  
and then answer the following questions....

14. 2. How did you get to school YESTERDAY morning? \*

Mark only one oval.



On the bus

☐ On the bus



On bike

☐ On bike



In the car/taxi

☐ In the car/taxi



Walked

☐ Walked



Ran/jogged

☐ Ran/jogged



Scooter

☐ Scooter



Skateboarded/Rollerbladed

☐ Skateboarded/Rollerbladed

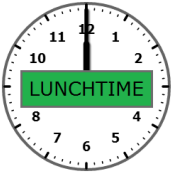

15. 3. What did you have to eat for lunch YESTERDAY? \*

Mark only one oval.

- ☐ School dinner
- ☐ Packed lunch
- ☐ Nothing

16. 4. What did you do for MOST of your break-times YESTERDAY? (This includes lunchtime) \*

Mark only one oval.

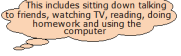

Sat around inside or outside

☐ Sat around inside or outside



Ran around

☐ Ran around



Stood around

☐ Stood around



Walked around

☐ Walked around

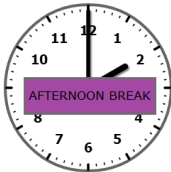

17. 5. Do you have an afternoon break at school? \*

Mark only one oval.

- ☐ YES
- ☐ NO

18. 6. How did you get home YESTERDAY? \*

Mark only one oval.



On the bus

☐ On the bus



On bike

☐ On bike



In the car/taxi

☐ In the car/taxi



Walked

☐ Walked



Ran/jogged

☐ Ran/jogged



Scooter

☐ Scooter



Skateboarded/Rollerbladed

☐ Skateboarded/Rollerbladed

AFTER SCHOOL

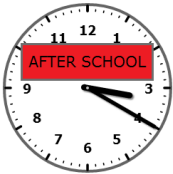

19. 7. How many portions of fruit and vegetables did you eat YESTERDAY? \*

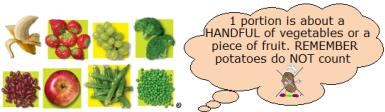

Mark only one oval.

- ☐ 0
- ☐ 1
- ☐ 2
- ☐ 3
- ☐ 4
- ☐ 5
- ☐ 6
- ☐ 7
- ☐ 8

20. 8. How many times did you brush your teeth YESTERDAY? \*

Mark only one oval.



0

☐ 0



1

☐ 1



2

☐ 2



+ More Than 2

☐ 3

21. 9. What time did you fall asleep YESTERDAY (to the nearest half hour)? \*

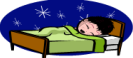

Mark only one oval.

- ☐ 7:00pm
- ☐ 7:30pm
- ☐ 8:00pm
- ☐ 8:30pm
- ☐ 9:00pm
- ☐ 9:30pm
- ☐ 10:00pm
- ☐ 10:30pm
- ☐ 11:00pm
- ☐ 11:30pm
- ☐ 12:00am
- ☐ 12:30am
- ☐ 1:00am
- ☐ 1:30am
- ☐ 2:00am
- ☐ 3:00am
- ☐ 3:30am
- ☐ 4:00am



31. 13a. How many times do you take part in a sports club OUTSIDE OF SCHOOL each week?

Mark only one oval.

|                       |                       |                       |                       |                       |                       |                       |                       |                       |                       |                       |
|-----------------------|-----------------------|-----------------------|-----------------------|-----------------------|-----------------------|-----------------------|-----------------------|-----------------------|-----------------------|-----------------------|
| 0                     | 1                     | 2                     | 3                     | 4                     | 5                     | 6                     | 7                     | 8                     | 9                     | 10                    |
| <input type="radio"/> | <input type="radio"/> | <input type="radio"/> | <input type="radio"/> | <input type="radio"/> | <input type="radio"/> | <input type="radio"/> | <input type="radio"/> | <input type="radio"/> | <input type="radio"/> | <input type="radio"/> |

32. 13b. If you take part in a sports club OUTSIDE of school, what is the name of the sports club? (For example Swansea Rugby Club Under 11's)

33. 14. Are you a member of cubs, brownies, scouts or guides? \*

Mark only one oval.

|                                                                                                                                       |                                                                                                                                     |
|---------------------------------------------------------------------------------------------------------------------------------------|-------------------------------------------------------------------------------------------------------------------------------------|
| <div> Yes</div> <div><input type="radio"/> Yes</div> | <div> No</div> <div><input type="radio"/> No</div> |
|---------------------------------------------------------------------------------------------------------------------------------------|-------------------------------------------------------------------------------------------------------------------------------------|

34. 15. Which of these sports or physical activities would you MOST like to try? (That you haven't tried before) \*

Mark only one oval.

|                                                                                                                                              |                                                                                                                                            |
|----------------------------------------------------------------------------------------------------------------------------------------------|--------------------------------------------------------------------------------------------------------------------------------------------|
| <div></div> <div><input type="radio"/> Athletics</div>    | <div></div> <div><input type="radio"/> Basketball</div> |
| <div></div> <div><input type="radio"/> Cricket</div>      | <div></div> <div><input type="radio"/> Dance</div>      |
| <div></div> <div><input type="radio"/> Gymnastics</div>   | <div></div> <div><input type="radio"/> Hockey</div>     |
| <div></div> <div><input type="radio"/> Multi Skills</div> | <div></div> <div><input type="radio"/> Netball</div>    |
| <div></div> <div><input type="radio"/> Rugby</div>        | <div></div> <div><input type="radio"/> Tennis</div>     |
| <div></div> <div><input type="radio"/> Swimming</div>   | <div><input type="radio"/> I do not want to try anything-I don't like sport or activity</div>                                              |
| <div><input type="radio"/> Other: _____</div>                                                                                                |                                                                                                                                            |

35. 16. Can you ride a bike WITHOUT STABILISERS? \*

Mark only one oval.



Yes



No

☐ Yes

☐ No

36. 17. Can you swim 25 metres WITHOUT A FLOAT OR ARMBANDS? (This is 1 length of a standard swimming pool) \*

Mark only one oval.



Yes



No

☐ Yes

☐ No

You and your feelings

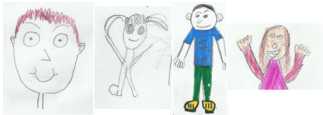

This part of the survey is going to ask you how you feel. There are no right or wrong answers. You should just pick the answer which is best for you.

37. 18. Tell us if you agree or disagree with the following: \*

Strongly agree

agree

✓

Agree

✓

Don't agree or disagree

Disagree

X

Strongly disagree

X

Mark only one oval per row.

|                                                            | Strongly agree        | Agree                 | Don't agree or disagree | Disagree              | Strongly disagree     |
|------------------------------------------------------------|-----------------------|-----------------------|-------------------------|-----------------------|-----------------------|
| I am doing well at school                                  | <input type="radio"/> | <input type="radio"/> | <input type="radio"/>   | <input type="radio"/> | <input type="radio"/> |
| I have lots of choice over things that are important to me | <input type="radio"/> | <input type="radio"/> | <input type="radio"/>   | <input type="radio"/> | <input type="radio"/> |
| There are lots of things I'm good at                       | <input type="radio"/> | <input type="radio"/> | <input type="radio"/>   | <input type="radio"/> | <input type="radio"/> |

19. On a scale of 0 to 10 (0 being very unhappy and 10 being very happy, how do you feel about:

\*Based on the Good Childhood Index by the Children's Society

38. Your Health \*



Mark only one oval.

0

1

2

3

4

5

6

7

8

9

10

Very unhappy

☐

☐

☐

☐

☐

☐

☐

☐

☐

☐

☐

Very happy

39. Your School \*



Mark only one oval.

0

1

2

3

4

5

6

7

8

9

10

Very unhappy

☐

☐

☐

☐

☐

☐

☐

☐

☐

☐

☐

Very happy

40. Your Family \*



Mark only one oval.

0

1

2

3

4

5

6

7

8

9

10

Very unhappy

☐

☐

☐

☐

☐

☐

☐

☐

☐

☐

☐

Very happy

41. Your Friends \*



Mark only one oval.

0

1

2

3

4

5

6

7

8

9

10

Very unhappy

☐

☐

☐

☐

☐

☐

☐

☐

☐

☐

☐

Very happy

42. Your Appearance (how you look) \*



Mark only one oval.

0

1

2

3

4

5

6

7

8

9

10

Very unhappy

☐

☐

☐

☐

☐

☐

☐

☐

☐

☐

☐

Very happy

43. Your Life \*



Mark only one oval.

0

1

2

3

4

5

6

7

8

9

10

Very unhappy

☐

☐

☐

☐

☐

☐

☐

☐

☐

☐

☐

Very happy

You and your Feelings

Based on the Me and My Feelings Questionnaire ( Deighton, Tymms, Vostanis, Belsky, Fonagy, Brown, Martin, Patalay, & Wolpert, 2012)

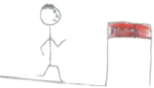

44. 20. Remember, there are no right or wrong answers, just pick which is right for you. \*

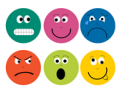

Mark only one oval per row.

|                             | Never                 | Sometimes             | Always                |
|-----------------------------|-----------------------|-----------------------|-----------------------|
| I feel lonely               | <input type="radio"/> | <input type="radio"/> | <input type="radio"/> |
| I cry a lot                 | <input type="radio"/> | <input type="radio"/> | <input type="radio"/> |
| I am unhappy                | <input type="radio"/> | <input type="radio"/> | <input type="radio"/> |
| I feel nobody likes me      | <input type="radio"/> | <input type="radio"/> | <input type="radio"/> |
| I worry a lot               | <input type="radio"/> | <input type="radio"/> | <input type="radio"/> |
| I have problems sleeping    | <input type="radio"/> | <input type="radio"/> | <input type="radio"/> |
| I wake up in the night      | <input type="radio"/> | <input type="radio"/> | <input type="radio"/> |
| I am shy                    | <input type="radio"/> | <input type="radio"/> | <input type="radio"/> |
| I feel scared               | <input type="radio"/> | <input type="radio"/> | <input type="radio"/> |
| I worry when I am at school | <input type="radio"/> | <input type="radio"/> | <input type="radio"/> |
| I get very angry            | <input type="radio"/> | <input type="radio"/> | <input type="radio"/> |
| I lose my temper            | <input type="radio"/> | <input type="radio"/> | <input type="radio"/> |
| I hit out when I am angry   | <input type="radio"/> | <input type="radio"/> | <input type="radio"/> |
| I do things to hurt people  | <input type="radio"/> | <input type="radio"/> | <input type="radio"/> |
| I am calm                   | <input type="radio"/> | <input type="radio"/> | <input type="radio"/> |
| I break things on purpose   | <input type="radio"/> | <input type="radio"/> | <input type="radio"/> |

Your Local Area

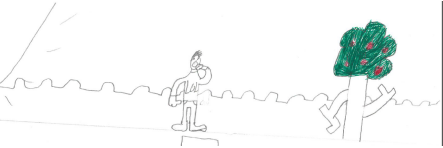

45. 21. On a scale of 0 to 10 (0 being not very safe and 10 being very safe), how safe do you feel playing in your area? \*

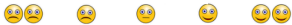

Mark only one oval.

|               | 0                     | 1                     | 2                     | 3                     | 4                     | 5                     | 6                     | 7                     | 8                     | 9                     | 10        |
|---------------|-----------------------|-----------------------|-----------------------|-----------------------|-----------------------|-----------------------|-----------------------|-----------------------|-----------------------|-----------------------|-----------|
| Not very safe | <input type="radio"/> | <input type="radio"/> | <input type="radio"/> | <input type="radio"/> | <input type="radio"/> | <input type="radio"/> | <input type="radio"/> | <input type="radio"/> | <input type="radio"/> | <input type="radio"/> | Very safe |

46. 22a. From your house, can you walk to school?

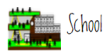

Mark only one oval.

☐ Yes  
☐ No

47. 22b. From your house, can you easily walk to a park?

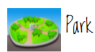

Mark only one oval.

☐ Yes  
☐ No

48. 22c. From your house, can you easily walk to a leisure centre/sports centre?

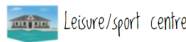

Mark only one oval.

☐ Yes  
☐ No

49. 23. Are you happy with the area that you live in?

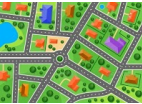

Mark only one oval.

☐ Yes  
☐ No

24. If you could change something to make you and your friends healthier and happier, what would you change...

50. IN SCHOOL? \*

51. OUT OF SCHOOL? \*

Well done, you've completed the questionnaire.  
Thank you!

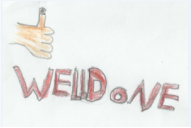

Don't forget to press submit below!
