# Supplementary material for: Pre-COVID-19 pandemic health-related behaviours in children (2018-2020) and association with being tested for SARS-CoV-2 and testing positive for SARS-CoV-2 (2020-2021): a retrospective cohort study using survey data linked with routine health data in Wales, UK
Source: bioRxiv or medRxiv preprint supplement (doi:10.1101/2022.01.21.22269651), 2022-04-29
Supplement: Supplementary file [file media-4.pdf]

#### Online supplemental appendix 4: HAPPEN survey variable codebook

| <b>Exposures</b>                 | <b>HAPPEN Survey item</b>                                                   | <b>Responses</b>                                                                                                                                          | <b>Analyses coding</b>                                                                                                          |
|----------------------------------|-----------------------------------------------------------------------------|-----------------------------------------------------------------------------------------------------------------------------------------------------------|---------------------------------------------------------------------------------------------------------------------------------|
| <b>Ate breakfast</b>             | <i>13. What did you eat for breakfast yesterday?</i>                        | <i>Nothing</i><br><i>Cereal</i><br><i>Snacks</i><br><i>Fruit</i><br><i>Toast</i><br><i>Cooked breakfast</i><br><i>Yoghurt</i>                             | Binary:<br><i>1 = Cereal; Snacks; Fruit; Toast; Cooked breakfast; Yoghurt</i><br><i>0 = Nothing</i>                             |
| <b>Active travel to school</b>   | <i>14. How did you get to school yesterday morning?</i>                     | <i>On the bus</i><br><i>In the car/taxi</i><br><i>Walked</i><br><i>On bike</i><br><i>Ran/jogged</i><br><i>Scooter</i><br><i>Skateboarded/rollerbladed</i> | Binary:<br><i>1 = Walked; On bike; Ran/jogged; Scooter; Skateboarded/rollerbladed</i><br><i>0 = On the bus; In the car/taxi</i> |
| <b>Active travel from school</b> | <i>18. How did you get home yesterday?</i>                                  | <i>On the bus</i><br><i>In the car/taxi</i><br><i>Walked</i><br><i>On bike</i><br><i>Ran/jogged</i><br><i>Scooter</i><br><i>Skateboarded/rollerbladed</i> | Binary:<br><i>1 = Walked; On bike; Ran/jogged; Scooter; Skateboarded/rollerbladed</i><br><i>0 = On the bus; In the car/taxi</i> |
| <b>Toothbrush 2+ per day</b>     | <i>20. How many times did you brush your teeth yesterday?</i>               | <i>0 – 3</i>                                                                                                                                              | Continuous:<br><i>0 – 3</i>                                                                                                     |
| <b>5+ fruit and veg</b>          | <i>19. How many portions of fruit and vegetables did you eat yesterday?</i> | <i>0 – 8</i>                                                                                                                                              | Continuous:<br><i>0 – 8</i>                                                                                                     |

#### Online supplemental appendix 4: HAPPEN survey variable codebook

|                                                                |                                                                                                                                                                                                                              |                                       |                                                           |
|----------------------------------------------------------------|------------------------------------------------------------------------------------------------------------------------------------------------------------------------------------------------------------------------------|---------------------------------------|-----------------------------------------------------------|
| <b>Sleep 9+ hours</b>                                          | 21. What time did you fall asleep last night                                                                                                                                                                                 | (30 min intervals)<br>7:00pm – 4:00am | Continuous:<br>Sleep hours calculated from item 21 and 22 |
|                                                                | 22. What time did you wake up this morning?                                                                                                                                                                                  | (30 min intervals)<br>5:00am – 9:00am |                                                           |
| <b>Physically active 60+ mins every day previous 7 days</b>    | 23. In the last 7 days, how many days did you do sports or exercise for at least 1 hour in total (This includes doing any activities or playing sports where your heart beat faster, you breathed faster and you felt warmer | 0 days                                | Ordinal:                                                  |
|                                                                |                                                                                                                                                                                                                              | 1 – 2 days                            | 0 days                                                    |
|                                                                |                                                                                                                                                                                                                              | 3 – 4 days                            | 1 – 2 days                                                |
|                                                                |                                                                                                                                                                                                                              | 5 – 6 days                            | 3 – 4 days                                                |
|                                                                |                                                                                                                                                                                                                              | 7 days                                | 5 – 6 days                                                |
| <b>Sedentary/screen time 2 hours every day previous 7 days</b> | 24. In the last 7 days, how many days did you watch TV/play online games/use the internet etc. for 2 or more hours a day (in total)?                                                                                         | 0 days                                | Ordinal:                                                  |
|                                                                |                                                                                                                                                                                                                              | 1 – 2 days                            | 0 days                                                    |
|                                                                |                                                                                                                                                                                                                              | 3 – 4 days                            | 1 – 2 days                                                |
|                                                                |                                                                                                                                                                                                                              | 5 – 6 days                            | 3 – 4 days                                                |
|                                                                |                                                                                                                                                                                                                              | 7 days                                | 5 – 6 days                                                |
| <b>Tired 7 days</b>                                            | 25. In the last 7 days, how many days did you feel tired?                                                                                                                                                                    | 0 days                                | Ordinal:                                                  |
|                                                                |                                                                                                                                                                                                                              | 1 – 2 days                            | 0 days                                                    |
|                                                                |                                                                                                                                                                                                                              | 3 – 4 days                            | 1 – 2 days                                                |
|                                                                |                                                                                                                                                                                                                              | 5 – 6 days                            | 3 – 4 days                                                |
|                                                                |                                                                                                                                                                                                                              | 7 days                                | 5 – 6 days                                                |
|                                                                |                                                                                                                                                                                                                              |                                       | 7 days                                                    |

#### Online supplemental appendix 4: HAPPEN survey variable codebook

|                                                      |                                                                                                                 |                                                                                               |                                                                                                           |
|------------------------------------------------------|-----------------------------------------------------------------------------------------------------------------|-----------------------------------------------------------------------------------------------|-----------------------------------------------------------------------------------------------------------|
| <b>Sugary snack 7 days</b>                           | <i>28. In the last 7 days, how many days did you eat at least one sugary snack (e.g. chocolate bar, sweets)</i> | <i>0 days</i><br><i>1 – 2 days</i><br><i>3 – 4 days</i><br><i>5 – 6 days</i><br><i>7 days</i> | Ordinal:<br><i>0 days</i><br><i>1 – 2 days</i><br><i>3 – 4 days</i><br><i>5 – 6 days</i><br><i>7 days</i> |
| <b>Participate in at least 3 out of school clubs</b> | <i>31. How many times do you take part in a sports club OUTSIDE OF SCHOOL each week?</i>                        | <i>0 - 10</i>                                                                                 | Continuous:<br><i>0 - 10</i>                                                                              |
| <b>Can ride a bike</b>                               | <i>35. Can you ride a bike without stabilisers?</i>                                                             | <i>No</i><br><i>Yes</i>                                                                       | Binary:<br><i>1 = Yes</i><br><i>0 = No</i>                                                                |
| <b>Can swim 25m</b>                                  | <i>36. Can you swim 25 metres without a float or armbands (This is 1 length of a standard swimming pool)</i>    | <i>No</i><br><i>Yes</i>                                                                       | Binary:<br><i>1 = Yes</i><br><i>0 = No</i>                                                                |
| <b>Age on 01/03/2020</b>                             | <i>Decimal age on 1 March 2020</i>                                                                              | Continuous                                                                                    | Continuous                                                                                                |
| <b>Sex</b>                                           | <i>Sex</i>                                                                                                      | <i>Girl</i><br><i>Boy</i>                                                                     | Binary:<br><i>0 = Girl</i><br><i>1 = Boy</i>                                                              |
| <b>WIMD</b>                                          | <i>Welsh Index of Multiple Deprivation 2019</i>                                                                 |                                                                                               | Coding framework from WIMD 2019[34]                                                                       |
