# Supplementary material for: Pre-COVID-19 pandemic health-related behaviours in children (2018-2020) and association with being tested for SARS-CoV-2 and testing positive for SARS-CoV-2 (2020-2021): a retrospective cohort study using survey data linked with routine health data in Wales, UK
Source: bioRxiv or medRxiv preprint supplement (doi:10.1101/2022.01.21.22269651), 2022-04-29
Supplement: Supplementary file [file media-6.pdf]

# Online supplemental appendix 6:

Multivariable logistic regression model of health behaviour markers and probability of PCR-test without confounders.

| PCR tested for SARS-CoV-2 (n=6,958, R <sup>2</sup> =0.01)                  | OR     | p value | 95% CI       |
|----------------------------------------------------------------------------|--------|---------|--------------|
| <b>Ate breakfast</b>                                                       | 1.05   | 0.632   | 0.87 – 1.27  |
| <i>Reference: did not eat breakfast</i>                                    | 1.00   |         |              |
| <b>Active travel to school</b>                                             | 0.92   | 0.238   | 0.80 – 1.06  |
| <i>Reference: did not active travel to school</i>                          | 1.00   |         |              |
| <b>Active travel from school</b>                                           | 1.08   | 0.273   | 0.94 – 1.24  |
| <i>Reference: did not active travel from school</i>                        | 1.00   |         |              |
| <b>Number of fruit/vegetable portions</b>                                  | 1.00   | 0.941   | 0.98 – 1.03  |
| <i>Reference: 0 fruit/vegetable portions</i>                               | 1.00   |         |              |
| <b>Number of times teeth brushed</b>                                       | 0.97   | 0.474   | 0.90 – 1.05  |
| <i>Reference: did not brush teeth</i>                                      | 1.00   |         |              |
| <b>Sleep hours</b>                                                         | 0.99   | 0.654   | 0.96 – 1.02  |
| <i>Reference: 0 days physically active ≥ 60 mins (previous seven days)</i> | 1.00   |         |              |
| <b>1-2 days physically active ≥ 60 mins</b>                                | 1.12   | 0.276   | 0.91 – 1.38  |
| <b>3-4 days physically active ≥ 60 mins</b>                                | 1.14   | 0.221   | 0.92 – 1.42  |
| <b>5-6 days physically active ≥ 60 mins</b>                                | 1.17   | 0.177   | 0.93 – 1.47  |
| <b>7 days physically active ≥ 60 mins</b>                                  | 1.09   | 0.475   | 0.87 – 1.37  |
| <i>Reference: 0 days sedentary ≥ two hours (previous seven days)</i>       | 1.00   |         |              |
| <b>1-2 days sedentary ≥ two hours</b>                                      | 1.16   | 0.209   | 0.92 – 1.46  |
| <b>3-4 days sedentary ≥ two hours</b>                                      | 1.18   | 0.166   | 0.93 – 1.49  |
| <b>5-6 days sedentary ≥ two hours</b>                                      | 1.15   | 0.275   | 0.90 – 1.47  |
| <b>7 days sedentary ≥ two hours</b>                                        | 1.14   | 0.256   | 0.91 – 1.44  |
| <i>Reference: 0 days felt tired (previous seven days)</i>                  | 1.00   |         |              |
| <b>1-2 days felt tired</b>                                                 | 0.98   | 0.791   | 0.86 – 1.13  |
| <b>3-4 days felt tired</b>                                                 | 0.99   | 0.881   | 0.84 – 1.16  |
| <b>5-6 days felt tired</b>                                                 | 1.04   | 0.667   | 0.86 – 1.26  |
| <b>7 days felt tired</b>                                                   | 0.97   | 0.730   | 0.83 – 1.14  |
| <i>Reference: 0 days consumed sugary snack (previous seven days)</i>       |        |         |              |
| <b>1-2 days consumed sugary snack</b>                                      | 1.21*  | 0.062   | 0.99 – 1.49  |
| <b>3-4 days consumed sugary snack</b>                                      | 1.08   | 0.489   | 0.87 – 1.33  |
| <b>5-6 days consumed sugary snack</b>                                      | 1.29** | 0.034   | 1.02 – 1.63  |
| <b>7 days consumed sugary snack</b>                                        | 1.12   | 0.314   | 0.90 – 1.39  |
| <b>Number of out of school clubs participation</b>                         | 1.02   | 0.121   | 1.00 to 1.04 |
| <b>Can ride a bike</b>                                                     | 1.16*  | 0.064   | 0.99 – 1.35  |

|                                      |        |       |             |
|--------------------------------------|--------|-------|-------------|
| <i>Reference: cannot ride a bike</i> | 1.00   |       |             |
| <b>Can swim 25m</b>                  | 1.30** | 0.000 | 1.15 – 1.46 |
| <i>Reference: cannot swim 25m</i>    | 1.00   |       |             |

OR: Odds Ratio; 95% CI: 95% confidence intervals; p<0.05\*\*, p<0.1\*. See online supplemental appendix 4 for variable codebook.

Multivariable logistic regression model of health behaviour markers and probability of PCR-test positive without confounders.

| <b>PCR test positive for SARS-CoV-2<br/>(n=6,958, R<sup>2</sup>=0.01)</b>  | <b>OR</b> | <b>p value</b> | <b>95% CI</b> |
|----------------------------------------------------------------------------|-----------|----------------|---------------|
| <b>Ate breakfast</b>                                                       | 1.30      | 0.170          | 0.89 – 1.91   |
| <i>Reference: did not eat breakfast</i>                                    | 1.00      |                |               |
| <b>Active travel to school</b>                                             | 0.91      | 0.451          | 0.71 – 1.17   |
| <i>Reference: did not active travel to school</i>                          | 1.00      |                |               |
| <b>Active travel from school</b>                                           | 1.07      | 0.614          | 0.83 – 1.36   |
| <i>Reference: did not active travel from school</i>                        | 1.00      |                |               |
| <b>Number of fruit/vegetable portions</b>                                  | 0.99      | 0.574          | 0.94 – 1.03   |
| <i>Reference: 0 fruit/vegetable portions</i>                               | 1.00      |                |               |
| <b>Number of times teeth brushed</b>                                       | 1.07      | 0.385          | 0.92 – 1.24   |
| <i>Reference: did not brush teeth</i>                                      | 1.00      |                |               |
| <b>Sleep hours</b>                                                         | 0.97      | 0.266          | 0.92 – 1.02   |
| <i>Reference: 0 days physically active ≥ 60 mins (previous seven days)</i> | 1.00      |                |               |
| <b>1-2 days physically active ≥ 60 mins</b>                                | 1.71      | 0.023          | 1.08 – 2.73   |
| <b>3-4 days physically active ≥ 60 mins</b>                                | 1.87      | 0.009          | 1.17 – 2.99   |
| <b>5-6 days physically active ≥ 60 mins</b>                                | 1.61      | 0.059          | 0.98 – 2.63   |
| <b>7 days physically active ≥ 60 mins</b>                                  | 1.49      | 0.117          | 0.91 – 2.43   |
| <i>Reference: 0 days sedentary ≥ two hours (previous seven days)</i>       | 1.00      |                |               |
| <b>1-2 days sedentary ≥ two hours</b>                                      | 1.03      | 0.877          | 0.68 – 1.57   |
| <b>3-4 days sedentary ≥ two hours</b>                                      | 1.00      | 0.983          | 0.66 – 1.54   |
| <b>5-6 days sedentary ≥ two hours</b>                                      | 1.01      | 0.958          | 0.65 – 1.59   |
| <b>7 days sedentary ≥ two hours</b>                                        | 1.10      | 0.660          | 0.72 – 1.66   |
| <i>Reference: 0 days felt tired (previous seven days)</i>                  | 1.00      |                |               |
| <b>1-2 days felt tired</b>                                                 | 1.21      | 0.125          | 0.95 – 1.55   |
| <b>3-4 days felt tired</b>                                                 | 1.17      | 0.278          | 0.88 – 1.55   |
| <b>5-6 days felt tired</b>                                                 | 1.21      | 0.273          | 0.86 – 1.69   |
| <b>7 days felt tired</b>                                                   | 0.92      | 0.600          | 0.69 – 1.24   |
| <i>Reference: 0 days consumed sugary snack (previous seven days)</i>       | 1.00      |                |               |
| <b>1-2 days consumed sugary snack</b>                                      | 1.14      | 0.499          | 0.78 – 1.67   |
| <b>3-4 days consumed sugary snack</b>                                      | 1.03      | 0.873          | 0.70 – 1.53   |
| <b>5-6 days consumed sugary snack</b>                                      | 1.38      | 0.131          | 0.91 – 2.11   |
| <b>7 days consumed sugary snack</b>                                        | 1.04      | 0.867          | 0.69 – 1.56   |
| <b>Number of out of school clubs participation</b>                         | 1.05      | 0.007          | 1.01 – 1.09   |
| <b>Can ride a bike</b>                                                     | 1.40      | 0.032          | 1.03 – 1.92   |

|                                      |      |       |             |
|--------------------------------------|------|-------|-------------|
| <i>Reference: cannot ride a bike</i> | 1.00 |       |             |
| <b>Can swim 25m</b>                  | 1.16 | 0.207 | 0.92 – 1.45 |
| <i>Reference: cannot swim 25m</i>    | 1.00 |       |             |
